# Supplementary material for: Drop-by-drop chemical reaction and sample introduction for capillary electrophoresis
Source: Royal Society of Chemistry journal article supplement (doi:10.1039/c5an00040h), 2015-01-01
Supplement: c5an00040h2.pdf [file c5an00040h2.pdf]

## Supporting Information for

### Drop-by-Drop Chemical Reaction and Sample Introduction for Capillary Electrophoresis

Fengming Chen,<sup>a,b</sup> Ying Rang<sup>a</sup>, Ying Weng<sup>a</sup>, Luyao Lin<sup>b</sup>, Hulin Zeng<sup>a</sup>, Hizuru Nakajim<sup>a</sup>, Jin-Ming  
Lin<sup>\*b</sup>, Katsumi Uchiyama<sup>\*a</sup>

<sup>a</sup>Department of Applied Chemistry, Graduate School of Urban Environmental Sciences, Tokyo, Metropolitan University, Minamiohsawa, Hachioji, Tokyo 192-0397, Japan

<sup>b</sup>Department of Chemistry, Beijing Key Laboratory of Microanalytical Methods and Instrumentation, Tsinghua University, Beijing 100084, China

. The 3 different voltages 2 kV, 3 kV and 4 kV were investigated to obtain the appropriate plug overlap time. The maximal amount of product was obtained only when the mixing voltage was applied for 18 s at 2 kV, 12 s at 3 kV, and 9 s at 4 kV.

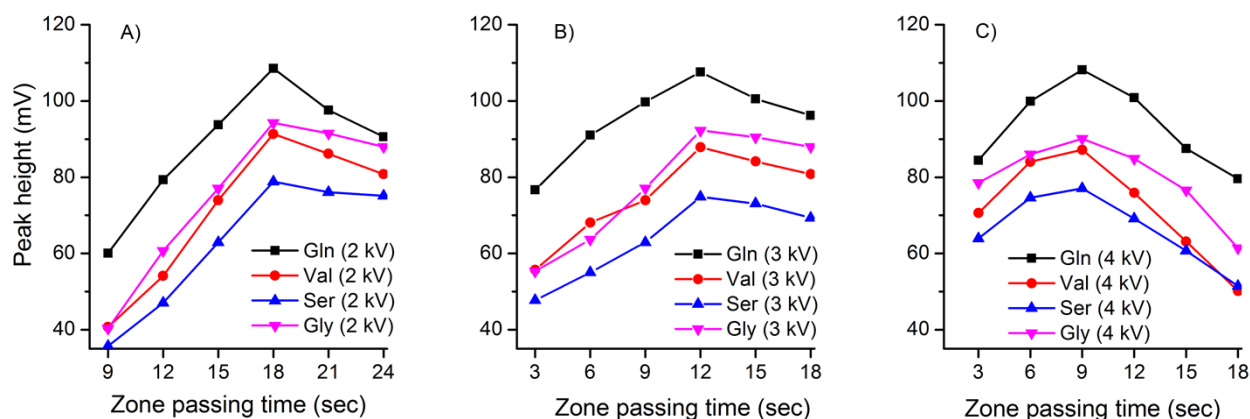

**Figure S1.** Relationship between the product amount and the time duration of mixing voltage applied.

Incubation time was fixed in 5 min after plug overlapping.

**Table S1.** The volumes of each droplet in different driving waveform (Frequency: 1kHz).

| Sample                                          | Channel | Driving voltage | Pulse width | Volume | RSD%(n=10) |
|-------------------------------------------------|---------|-----------------|-------------|--------|------------|
| Amino acids                                     | 1       | 44 v            | 22 $\mu$ s  | 181 pL | 1.5        |
| NBD-F                                           | 2       | 40 v            | 24 $\mu$ s  | 183 pL | 2.1        |
| $V_{\text{Amino acid}}:V_{\text{NBD-F}}$<br>1:1 | 3       | 44 v            | 20 $\mu$ s  | 182 pL | 2.2        |

**Table S2.** Linearity of peak areas v.s. droplet number for four amino acids.

| Analyte          | Droplet number | Linearity-dose curve                     |
|------------------|----------------|------------------------------------------|
| Gln(5 $\mu$ M)   | 5-150          | Y=163.86 X-395.45 R <sup>2</sup> =0.9889 |
| Val (50 $\mu$ M) | 5-150          | Y=141.65 X-319.56 R <sup>2</sup> =0.9930 |
| Ser (50 $\mu$ M) | 5-100          | Y=161.51 X-313.46 R <sup>2</sup> =0.9927 |
| Gly (25 $\mu$ M) | 5-100          | Y=231.47 X-463.81 R <sup>2</sup> =0.9915 |
